# Supplementary material for: Preclinical species gene expression database: Development and meta-analysis
Source: Front Genet. 2023 Jan 17;13:1078050. doi: 10.3389/fgene.2022.1078050 (PMC9887474; doi:10.3389/fgene.2022.1078050)
Supplement: Supplementary file 12 [file DataSheet1.xlsx]

## Sheet: Sheet1
Sample Name	WBC (x103/uL)	RBC (x106/uL)	Hemoglobin (g/dL)	Hematocrit (%)	MCV (fL)	MCH (pg)	CH (cellular hemoglobin) (pg)	MCHC (g/dL)	CHCM (Cellular hemoglobin concentration mean) (g/dL)	RDW (%)	HDW (g/dL)	Mean Platelet Volume (fL)	Plt (x103/uL)	MPV (fL)	MPC (g/dL)	PCT (Plateletcrit) (%)	PDW (%)	%NEUT	%LYMPH	%MONO	%EOS	%BASO	%LUC	%Retic	CHr (Reticulocyte hemoglobin content) (pg)	CHm (Hemoglobin Eryhtrocyte content) (pg)	#NEUT(103cells/ul)	#LYMPH(103cells/ul)	#MONO(103cells/ul)	#EOS(103cells/ul)	#BASO(103cells/ul)	#LUC(103cells/ul)	#Retic(109cells/L)	%Low Retics	%Med Retics	%High Retics
Male Rat 1001	8.04	7.34	14.8	46.6	63.4	20.2	19.9	31.8	31.4	13.6	2.18	NA	1057	8.7	17.1	0.92	44.6	15.5	76.9	5.2	0.8	0.9	0.6	4	19.4	20.3	1.25	6.19	0.42	0.07	0.07	0.05	293.4	41.8	40.44	17.77
Male Rat 1003	9.82	7.2	13.8	44.4	61.6	19.1	18.9	31	30.6	14	2.11	NA	1040	8.8	16.9	0.92	43.6	23.8	68.7	5.6	0.5	0.5	0.9	4.21	19	19.2	2.34	6.74	0.55	0.05	0.05	0.09	303.1	36.08	43.06	20.86
Male Rat 1005	7.27	7.12	14.1	44.8	62.9	19.7	19.4	31.4	30.9	13.1	2.05	NA	1011	8.6	17.7	0.87	43.9	10.4	84.6	2.5	0.8	0.6	1.2	4.16	19.6	19.8	0.76	6.15	0.18	0.06	0.04	0.09	296.2	38.04	43.29	18.67
Female Rat 1002	8.24	6.78	13.9	42.4	62.5	20.5	20.5	32.9	32.9	11.3	1.97	NA	968	8.1	18.5	0.79	40.3	12.3	82.1	3.6	1.1	0.4	0.6	2.52	19.6	19.7	1.01	6.76	0.29	0.09	0.03	0.05	170.6	56.42	37.71	5.86
Female Rat 1004	6.17	6.74	13.7	42	62.4	20.4	20.5	32.7	32.9	12.5	1.93	NA	1255	7.7	18.5	0.97	39.7	10.1	85.4	2.5	0.7	0.6	0.7	4.04	19.6	19.5	0.62	5.27	0.16	0.05	0.04	0.04	271.9	46.7	43.43	9.86
Female Rat 1006	7	7.53	15.3	46.9	62.3	20.3	20.6	32.6	33.1	11.2	2.21	NA	917	7.9	18.6	0.72	39.4	12.1	82.7	2.8	1.1	0.7	0.5	2.61	20.1	19.6	0.85	5.79	0.19	0.08	0.05	0.04	196.5	52.67	38.28	9.05
Female Dog 1002	10.51	6.57	15.2	45.5	69.2	23.1	23.1	33.3	33.5	12.7	1.51	NA	302	11.5	19.5	0.35	48.2	64.3	29.3	3	2.5	0.6	0.3	0.68	26.7	23.8	6.76	3.08	0.31	0.27	0.06	0.03	44.8	89.74	7.33	2.93
Female Dog 1004	8.18	7.48	17.1	51.5	68.9	22.8	22.7	33.1	33	13.7	1.33	NA	271	10.4	20.7	0.28	46.1	57.7	33.1	5	3.3	0.6	0.3	0.54	27	23.3	4.72	2.71	0.41	0.27	0.05	0.02	40	84.88	13.75	1.37
Female Dog 1006	11.87	6.67	15.5	46.1	69.2	23.3	23	33.6	33.4	13.4	1.47	NA	329	11	19.7	0.36	47.8	66.3	24.5	4.2	4	0.7	0.3	0.84	27.7	23.7	7.87	2.91	0.5	0.48	0.08	0.04	56	89.77	7.67	2.56
Male Dog 1001	7.93	7.36	16.9	49.6	67.4	23	23.2	34.1	34.6	13.6	1.62	NA	226	12.9	NA	NA	NA	63.7	26.7	4	4.3	0.9	0.4	0.53	NA	NA	5.05	2.12	0.32	0.34	0.07	0.03	38.8	75	17.91	7.01
Male Dog 1003	7.48	7.38	18.1	52.5	71.1	24.5	25.1	34.4	35.4	13.5	1.64	NA	256	11.6	NA	NA	NA	57.8	29.9	6.9	4.1	0.8	0.5	0.33	NA	NA	4.33	2.24	0.51	0.31	0.06	0.04	24.1	85.41	8.65	5.95
Male Dog 1005	8.77	6.65	15.7	46.2	69.4	23.5	24.2	33.9	35	12.4	1.52	NA	266	10.8	NA	NA	NA	51.8	34.6	6	5.9	1	0.6	0.28	NA	NA	4.54	3.04	0.53	0.52	0.09	0.05	18.6	89.66	6.21	4.14
Male Monkey 1001	9.0	6.16	15.0	51.4	83.4	24.3	NA	29.1	NA	NA	NA	10.4	NA	10.4	NA	NA	NA	34.4	58.2	5.4	1.3	0.2	0.5	1.0	NA	NA	3.10	5.25	0.48	0.12	0.02	0.05	62.0	NA	NA	NA
Male Monkey 1002	9.0	5.90	14.2	48.0	81.4	24.0	NA	29.5	NA	NA	NA	11.5	NA	11.5	NA	NA	NA	29.4	61.2	8.5	0.2	0.3	0.4	1.3	NA	NA	2.64	5.50	0.76	0.02	0.03	0.04	74.5	NA	NA	NA
Male Monkey 1003	12.5	5.61	13.9	45.2	80.6	24.8	NA	30.8	NA	NA	NA	9.0	NA	9.0	NA	NA	NA	23.3	72.3	3.0	0.5	0.3	0.6	1.7	NA	NA	2.91	9.06	0.38	0.06	0.04	0.07	93.9	NA	NA	NA
Female Monkey 1501	12.1	6.01	13.7	45.7	76.0	22.8	NA	30.0	NA	NA	NA	11.0	NA	11.0	NA	NA	NA	40.5	52.6	5.4	0.7	0.3	0.5	0.7	NA	NA	4.89	6.36	0.66	0.08	0.04	0.06	41.8	NA	NA	NA
Female Monkey 1502	23.1	6.02	13.1	43.2	71.9	21.7	NA	30.2	NA	NA	NA	10.0	NA	10.0	NA	NA	NA	83.4	14.1	2.0	0.1	0.2	0.2	0.7	NA	NA	19.25	3.26	0.45	0.01	0.04	0.05	43.7	NA	NA	NA
Female Monkey 1503	12.8	5.58	13.0	43.2	77.5	23.3	NA	30.0	NA	NA	NA	11.6	NA	11.6	NA	NA	NA	52.3	43.1	1.9	1.8	0.3	0.6	0.5	NA	NA	6.70	5.52	0.25	0.24	0.04	0.07	28.2	NA	NA	NA
	NA Indicates result not available

## Sheet: Sheet2
	CHr	Reticulocte Hemoglobin count
	CHm	Hemoglobin Eryhtrocyte content
